# Supplementary material for: BMI1 activates P-glycoprotein via transcription repression of miR-3682-3p and enhances chemoresistance of bladder cancer cell
Source: publisher site journal article supplement (doi:10.18632/aging.203277), 2021-07-16
Supplement: Supplementary file [file aging-v13i14-203277-supplementary-material-SD1.pdf]

**SUPPLEMENTARY FIGURE**

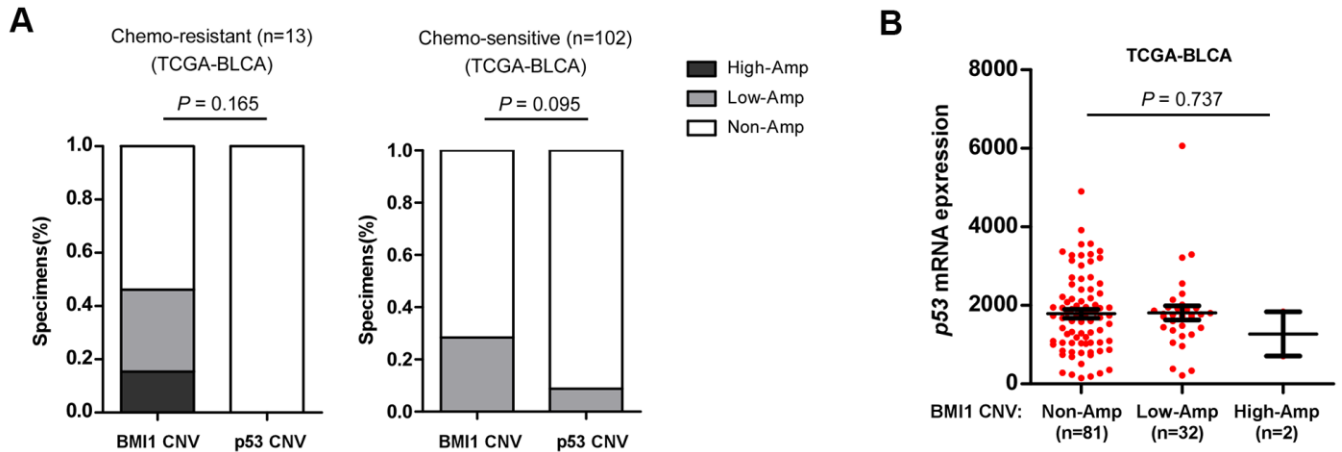

**Supplementary Figure 1.** (A) Correlation analyses of CNV in BMI1 expression with p53 gene CNV in chemo-resistant (left) and chemo-sensitive (right) bladder cancer specimens from TCGA dataset. (B) BMI1 gene CNV and p53 mRNA expression in a TCGA-BLCA data set ( $P = 0.737$ ). CNV: copy number variant; TCGA: The Cancer Genome Atlas; BLCA: Bladder Urothelial Carcinoma.
